# Supplementary material for: Associations among NMR-measured inflammatory and metabolic biomarkers and accelerated aging in cardiac catheterization patients
Source: publisher site journal article supplement (doi:10.18632/aging.205758), 2024-04-23
Supplement: Supplementary file [file aging-v16i8-205758-supplementary-material-SD1.pdf]

## SUPPLEMENTARY FIGURE

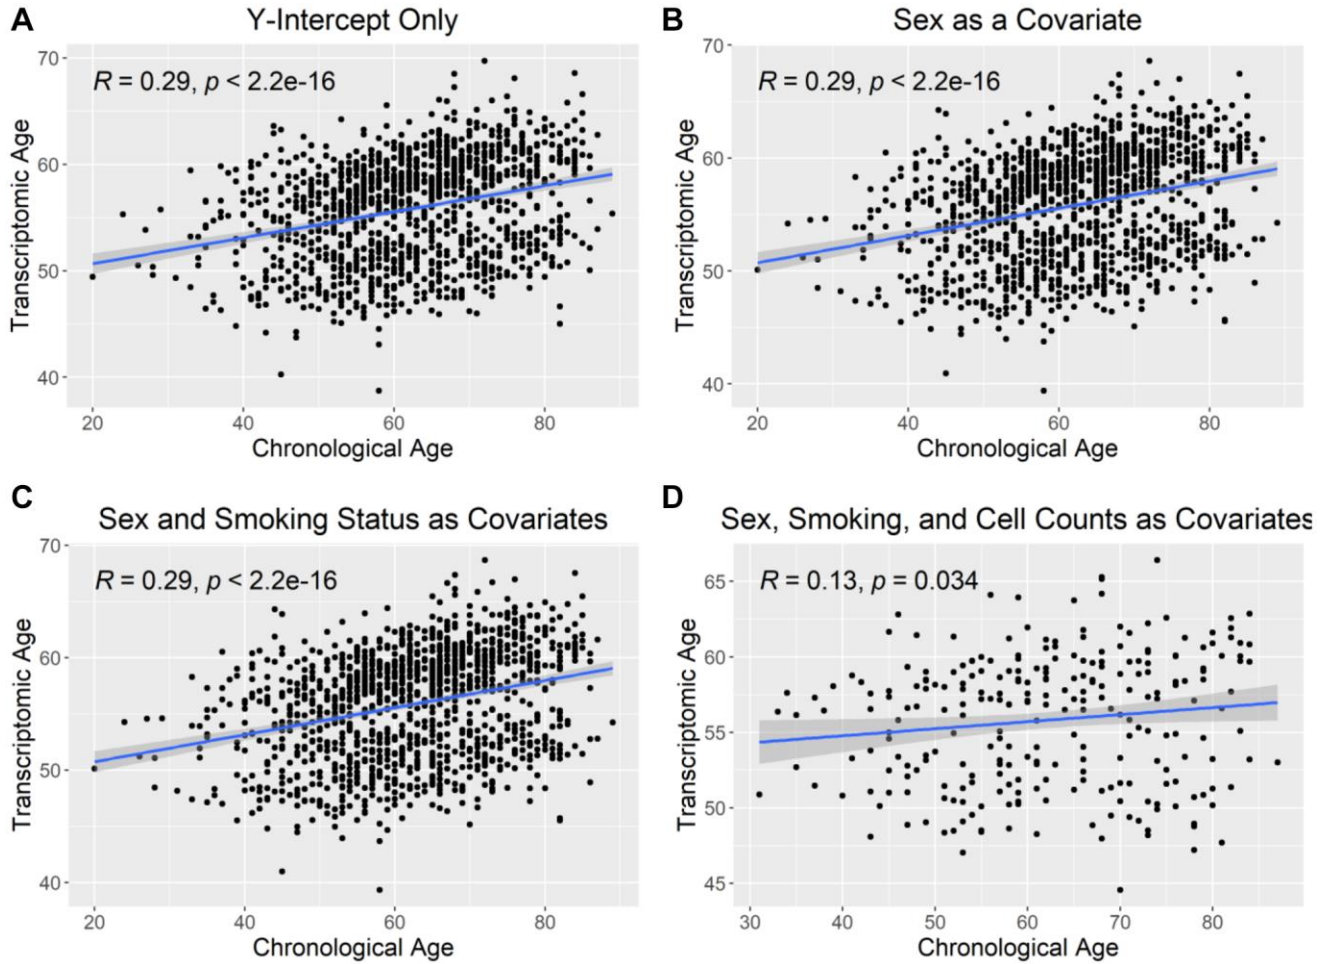

**Supplementary Figure 1. Correlation between chronological age and transcriptomic age when transcriptomic age was calculated using different covariates.** The scatterplots show the correlation between chronological age and transcriptomic age. (A–D) show these correlations using residuals from models for estimating transcriptomic age where the models differ in the included covariates. In (A) no additional covariates were included beyond the intercept (which was included in all models). In (B) the model was adjusted for sex. In (C) the model was adjusted for sex and smoking status. Finally, in (D) the model was adjusted for sex, smoking status, and cell counts.  $R$  = Pearson correlation coefficient.
