# Supplementary material for: Associations among NMR-measured inflammatory and metabolic biomarkers and accelerated aging in cardiac catheterization patients
Source: publisher site journal article supplement (doi:10.18632/aging.205758), 2024-04-23
Supplement: Supplementary file [file aging-v16i8-205758-supplementary-material-SD2.pdf]

## SUPPLEMENTARY TABLES

**Supplementary Table 1. Associations between accelerated ages of epigenetic and transcriptomic biomarkers and nuclear magnetic resonance biomarkers.**

| Biomarker | Aging predictor    | Coefficient (95% CI)                                                      | P-value                  |
|-----------|--------------------|---------------------------------------------------------------------------|--------------------------|
| GlycA     | GrimAge            | 5.71 (4.36, 7.05)                                                         | $7.94 \times 10^{-16}$ * |
| ApoB      | GrimAge            | 0.10 (-0.35, 0.55)                                                        | 0.65                     |
| ApoA-1    | GrimAge            | -1.03 (-1.42, -0.63)                                                      | $5.50 \times 10^{-7}$ *  |
| Glu       | GrimAge            | -0.12 (-0.82, 0.59)                                                       | 0.74                     |
| ApoB: A-1 | GrimAge            | 0.02 (-0.01, 0.06)                                                        | 0.20                     |
| GlycA     | Hannum Age         | 1.81 (0.65, 2.98)                                                         | $2.30 \times 10^{-3}$    |
| ApoB      | Hannum Age         | -0.06 (-0.42, 0.31)                                                       | 0.76                     |
| ApoA-1    | Hannum Age         | -0.41 (-0.74, -0.08)                                                      | 0.01                     |
| Glu       | Hannum Age         | 0.37 (-0.20, 0.94)                                                        | 0.21                     |
| ApoB: A-1 | Hannum Age         | 0.01 (-0.02, 0.04)                                                        | 0.47                     |
| GlycA     | Horvath Age        | 0.81 (-0.45, 2.07)                                                        | 0.21                     |
| ApoB      | Horvath Age        | -0.19 (-0.58, 0.21)                                                       | 0.36                     |
| ApoA-1    | Horvath Age        | -0.29 (-0.64, 0.07)                                                       | 0.12                     |
| Glu       | Horvath Age        | 0.28 (-0.34, 0.89)                                                        | 0.37                     |
| ApoB: A-1 | Horvath Age        | $-5.22 \times 10^{-3}$ (-0.03, 0.02)                                      | 0.73                     |
| GlycA     | Phenotypic Age     | 2.88 (1.91, 3.87)                                                         | $1.21 \times 10^{-8}$ *  |
| ApoB      | Phenotypic Age     | 0.07 (-0.25, 0.39)                                                        | 0.67                     |
| ApoA-1    | Phenotypic Age     | -0.55 (-0.83, -0.26)                                                      | $1.58 \times 10^{-4}$ *  |
| Glu       | Phenotypic Age     | 0.12 (-0.38, 0.61)                                                        | 0.64                     |
| ApoB: A-1 | Phenotypic Age     | $8.96 \times 10^{-3}$ (-0.01, 0.03)                                       | 0.46                     |
| GlycA     | Transcriptomic Age | 0.34 (-0.85, 1.53)                                                        | 0.57                     |
| ApoB      | Transcriptomic Age | 0.05 (-0.26, 0.37)                                                        | 0.74                     |
| ApoA-1    | Transcriptomic Age | 0.34 (0.04, 0.63)                                                         | 0.03                     |
| Glu       | Transcriptomic Age | 0.23 (-0.36, 0.82)                                                        | 0.45                     |
| ApoB: A-1 | Transcriptomic Age | $-1.27 \times 10^{-3}$ ( $-5.29 \times 10^{-3}$ , $2.75 \times 10^{-3}$ ) | 0.54                     |

Abbreviation: CI: confidence interval; \*indicates Bonferroni significant P-value ( $P < 1.43 \times 10^{-3}$ ).

**Supplementary Table 2. Associations between nuclear magnetic resonance biomarkers and multiple adjusted accelerated ages of epigenetic and transcriptomic aging biomarkers.**

| Biomarker | Aging predictor adjustment | Aging predictor | Coefficient (95% CI)                                   | P-value                 |
|-----------|----------------------------|-----------------|--------------------------------------------------------|-------------------------|
| GlycA     | Gr + Ha + Ho + Ph + TA     | GrimAge         | 5.03 (3.01, 7.05)                                      | $1.85 \times 10^{6}$ *  |
| ApoB      | Gr + Ha + Ho + Ph + TA     | GrimAge         | 0.45 (-0.22, 1.11)                                     | 0.19                    |
| ApoA-1    | Gr + Ha + Ho + Ph + TA     | GrimAge         | -1.13 (-1.71, -0.55)                                   | $1.83 \times 10^{-4}$ * |
| Glu       | Gr + Ha + Ho + Ph + TA     | GrimAge         | -0.09 (-1.16, 0.99)                                    | 0.87                    |
| ApoB: A-1 | Gr + Ha + Ho + Ph + TA     | GrimAge         | $1.04 \times 10^{-2}$ ( $2.9 \times 10^{-3}$ , 0.02)   | $6.84 \times 10^{-3}$   |
| GlycA     | Gr + Ha + Ho + Ph + TA     | Hannum Age      | 1.17 (-0.77, 3.12)                                     | 0.24                    |
| ApoB      | Gr + Ha + Ho + Ph + TA     | Hannum Age      | 0.24 (-0.40, 0.88)                                     | 0.46                    |
| ApoA-1    | Gr + Ha + Ho + Ph + TA     | Hannum Age      | -0.60 (-1.16, -0.04)                                   | 0.04                    |
| Glu       | Gr + Ha + Ho + Ph + TA     | Hannum Age      | 0.21 (-0.82, 1.25)                                     | 0.68                    |
| ApoB: A-1 | Gr + Ha + Ho + Ph + TA     | Hannum Age      | $6.27 \times 10^{-3}$ ( $-9.74 \times 10^{-4}$ , 0.01) | 0.09                    |
| GlycA     | Gr + Ha + Ho + Ph + TA     | Horvath Age     | -2.94 (-4.86, -1.02)                                   | $2.89 \times 10^{-3}$   |

|           |                        |                    |                                                                           |      |
|-----------|------------------------|--------------------|---------------------------------------------------------------------------|------|
| ApoB      | Gr + Ha + Ho + Ph + TA | Horvath Age        | -0.80 (-1.43, -0.16)                                                      | 0.01 |
| ApoA-1    | Gr + Ha + Ho + Ph + TA | Horvath Age        | -0.12 (-0.67, 0.44)                                                       | 0.67 |
| Glu       | Gr + Ha + Ho + Ph + TA | Horvath Age        | 0.13 (-0.89, 1.15)                                                        | 0.80 |
| ApoB: A-1 | Gr + Ha + Ho + Ph + TA | Horvath Age        | $-6.89 \times 10^{-3}$ (-0.01, $2.66 \times 10^{-4}$ )                    | 0.06 |
| GlycA     | Gr + Ha + Ho + Ph + TA | Phenotypic Age*    | 2.27 (0.47, 4.06)                                                         | 0.01 |
| ApoB      | Gr + Ha + Ho + Ph + TA | Phenotypic Age     | 0.18 (-0.41, 0.77)                                                        | 0.55 |
| ApoA-1    | Gr + Ha + Ho + Ph + TA | Phenotypic Age     | 0.28 (-0.24, 0.80)                                                        | 0.29 |
| Glu       | Gr + Ha + Ho + Ph + TA | Phenotypic Age     | 0.33 (-0.62, 1.29)                                                        | 0.49 |
| ApoB: A-1 | Gr + Ha + Ho + Ph + TA | Phenotypic Age     | $-2.30 \times 10^{-4}$ ( $-6.93 \times 10^{-3}$ , $6.47 \times 10^{-3}$ ) | 0.95 |
| GlycA     | Gr + Ha + Ho + Ph + TA | Transcriptomic Age | -0.85 (-2.90, 1.13)                                                       | 0.39 |
| ApoB      | Gr + Ha + Ho + Ph + TA | Transcriptomic Age | 0.08 (-0.58, 0.75)                                                        | 0.80 |
| ApoA-1    | Gr + Ha + Ho + Ph + TA | Transcriptomic Age | 0.56 (-0.02, 1.15)                                                        | 0.06 |
| Glu       | Gr + Ha + Ho + Ph + TA | Transcriptomic Age | -0.13 (-1.20, 0.94)                                                       | 0.81 |
| ApoB: A-1 | Gr + Ha + Ho + Ph + TA | Transcriptomic Age | $-3.86 \times 10^{-3}$ (-0.01, $3.66 \times 10^{-3}$ )                    | 0.31 |

Abbreviations: Gr: Grim Age; Ha: Hannum Age; Ho: Horvath Age; Ph: Phenotypic Age; TA: Transcriptomic Age; CI: confidence interval. \*indicates Bonferroni significant  $P$ -value ( $P < 1.43 \times 10^{-3}$ ).

**Supplementary Table 3. Associations between nuclear magnetic resonance biomarkers and multiple adjusted accelerated ages of epigenetic aging biomarkers.**

| Biomarker | Aging predictor adjustment | Aging predictor | Coefficient (95% CI)                                                     | $P$ -value              |
|-----------|----------------------------|-----------------|--------------------------------------------------------------------------|-------------------------|
| GlycA     | Gr + Ha + Ho + Ph          | GrimAge         | 5.03 (3.01, 7.05)                                                        | $1.83 \times 10^{-6}$ * |
| ApoB      | Gr + Ha + Ho + Ph          | GrimAge         | 0.45 (-0.22, 1.11)                                                       | 0.19                    |
| ApoA-1    | Gr + Ha + Ho + Ph          | GrimAge         | -1.13 (-1.72, -0.54)                                                     | $2.02 \times 10^{-4}$ * |
| Glu       | Gr + Ha + Ho + Ph          | GrimAge         | -0.08 (-1.16, 0.98)                                                      | 0.87                    |
| ApoB: A-1 | Gr + Ha + Ho + Ph          | GrimAge         | 0.01 ( $2.89 \times 10^{-3}$ , $1.79 \times 10^{-2}$ )                   | $6.88 \times 10^{-3}$   |
| GlycA     | Gr + Ha + Ho + Ph          | Hannum Age      | 1.07 (-0.86, 2.99)                                                       | 0.28                    |
| ApoB      | Gr + Ha + Ho + Ph          | Hannum Age      | 0.25 (-0.38, 0.89)                                                       | 0.43                    |
| ApoA-1    | Gr + Ha + Ho + Ph          | Hannum Age      | -0.53 (-1.09, 0.03)                                                      | 0.06                    |
| Glu       | Gr + Ha + Ho + Ph          | Hannum Age      | 0.20 (-0.82, 1.22)                                                       | 0.70                    |
| ApoB: A-1 | Gr + Ha + Ho + Ph          | Hannum Age      | $5.80 \times 10^{-3}$ ( $-1.39 \times 10^{-3}$ , 0.01)                   | 0.11                    |
| GlycA     | Gr + Ha + Ho + Ph          | Horvath Age     | -2.90 (-4.81, -0.98)                                                     | $3.23 \times 10^{-3}$   |
| ApoB      | Gr + Ha + Ho + Ph          | Horvath Age     | -0.80 (-1.43, -0.17)                                                     | 0.01                    |
| ApoA-1    | Gr + Ha + Ho + Ph          | Horvath Age     | -0.14 (-0.70, 0.42)                                                      | 0.61                    |
| Glu       | Gr + Ha + Ho + Ph          | Horvath Age     | 0.14 (-0.88, 1.15)                                                       | 0.79                    |
| ApoB: A-1 | Gr + Ha + Ho + Ph          | Horvath Age     | $-6.72 \times 10^{-3}$ (-0.01, $4.28 \times 10^{-4}$ )                   | 0.07                    |
| GlycA     | Gr + Ha + Ho + Ph          | Phenotypic Age  | 2.26 (0.46, 4.05)                                                        | 0.01                    |
| ApoB      | Gr + Ha + Ho + Ph          | Phenotypic Age  | 0.18 (-0.41, 0.77)                                                       | 0.55                    |
| ApoA-1    | Gr + Ha + Ho + Ph          | Phenotypic Age  | 0.29 (-0.24, 0.81)                                                       | 0.28                    |
| Glu       | Gr + Ha + Ho + Ph          | Phenotypic Age  | 0.33 (-0.62, 1.28)                                                       | 0.50                    |
| ApoB: A-1 | Gr + Ha + Ho + Ph          | Phenotypic Age  | $-2.63 \times 10^{-4}$ ( $-7.0 \times 10^{-3}$ , $6.43 \times 10^{-3}$ ) | 0.94                    |

Abbreviations: Gr: Grim Age; Ho: Horvath Age; Ha: Hannum Age; Ph: Phenotypic Age; CI: confidence interval. \*indicates Bonferroni significant  $P$ -value ( $P < 1.43 \times 10^{-3}$ ).

**Supplementary Table 4. Associations between accelerated ages of individual epigenetic and transcriptomic aging predictors and nuclear magnetic resonance multi markers.**

| <b>Biomarker</b> | <b>Aging predictor adjustment</b> | <b>Aging predictor</b> | <b>Coefficient (95% CI)</b>              | <b>P-value</b> |
|------------------|-----------------------------------|------------------------|------------------------------------------|----------------|
| LP-IR            | Grim Age                          | GrimAge                | 0.18 (−0.20, 0.56)                       | 0.35           |
| DRI              | Grim Age                          | GrimAge                | −0.29 (−0.57, −2.03 × 10 <sup>−3</sup> ) | 0.05           |
| LP-IR            | Hannum Age                        | Hannum Age             | 0.15 (−0.16, 0.46)                       | 0.34           |
| DRI              | Hannum Age                        | Hannum Age             | −0.04 (−0.28, 0.19)                      | 0.72           |
| LP-IR            | Horvath Age                       | Horvath Age            | 0.32 (−9.36 × 10 <sup>−3</sup> , 0.66)   | 0.06           |
| DRI              | Horvath Age                       | Horvath Age            | 0.06 (−0.20, 0.31)                       | 0.67           |
| LP-IR            | Phenotypic Age                    | Phenotypic Age         | 0.18 (−0.08, 0.45)                       | 0.18           |
| DRI              | Phenotypic Age                    | Phenotypic Age         | −0.09 (−0.29, 0.15)                      | 0.40           |
| LP-IR            | Transcriptomic Age                | Transcriptomic Age     | −0.13 (−0.44, 0.18)                      | 0.40           |
| DRI              | Transcriptomic Age                | Transcriptomic Age     | −0.02 (−0.26, 0.23)                      | 0.88           |

Abbreviation: CI: confidence interval.

**Supplementary Table 5. Associations between nuclear magnetic resonance multi markers and multiple adjusted accelerated ages of epigenetic and transcriptomic aging biomarkers.**

| <b>Biomarker</b> | <b>Aging predictor adjustment</b> | <b>Aging predictor</b> | <b>Coefficient (95% CI)</b> | <b>P-value</b> |
|------------------|-----------------------------------|------------------------|-----------------------------|----------------|
| LP-IR            | Gr + Ha + Ho + Ph + TA            | GrimAge                | 0.32 (−0.28, 0.93)          | 0.29           |
| DRI              | Gr + Ha + Ho + Ph + TA            | GrimAge                | −0.22 (−0.68, 0.24)         | 0.35           |
| LP-IR            | Gr + Ha + Ho + Ph + TA            | Hannum Age             | 0.16 (−0.42, 0.74)          | 0.59           |
| DRI              | Gr + Ha + Ho + Ph + TA            | Hannum Age             | −0.01 (−0.46, 0.43)         | 0.95           |
| LP-IR            | Gr + Ha + Ho + Ph + TA            | Horvath Age            | 0.13 (−0.44, 0.71)          | 0.64           |
| DRI              | Gr + Ha + Ho + Ph + TA            | Horvath Age            | 0.04 (−0.40, 0.48)          | 0.87           |
| LP-IR            | Gr + Ha + Ho + Ph + TA            | Phenotypic Age         | −0.12 (−0.66, 0.42)         | 0.66           |
| DRI              | Gr + Ha + Ho + Ph + TA            | Phenotypic Age         | −0.10 (−0.51, 0.31)         | 0.64           |
| LP-IR            | Gr + Ha + Ho + Ph + TA            | Transcriptomic Age     | −0.11 (−0.72, 0.49)         | 0.71           |
| DRI              | Gr + Ha + Ho + Ph + TA            | Transcriptomic Age     | −0.08 (−0.55, 0.38)         | 0.72           |

Abbreviations: Gr: Grim Age; Ha: Hannum Age; Ho: Horvath Age; Ph: Phenotypic Age; TA: Transcriptomic Age; CI: confidence interval.

**Supplementary Table 6. Associations between nuclear magnetic resonance multi markers and multiple adjusted accelerated ages of epigenetic aging predictors.**

| <b>Biomarker</b> | <b>Aging predictor adjustment</b> | <b>Aging predictor</b> | <b>Coefficient (95% CI)</b> | <b>P-value</b> |
|------------------|-----------------------------------|------------------------|-----------------------------|----------------|
| LP-IR            | Gr + Ha + Ho + Ph                 | GrimAge                | 0.32 (−0.35, 0.93)          | 0.29           |
| DRI              | Gr + Ha + Ho + Ph                 | GrimAge                | −0.22 (−0.68, 0.24)         | 0.35           |
| LP-IR            | Gr + Ha + Ho + Ph                 | Hannum Age             | 0.15 (−0.43, 0.72)          | 0.62           |
| DRI              | Gr + Ha + Ho + Ph                 | Hannum Age             | −0.03 (−0.46, 0.41)         | 0.91           |
| LP-IR            | Gr + Ha + Ho + Ph                 | Horvath Age            | 0.14 (−0.43, 0.71)          | 0.63           |
| DRI              | Gr + Ha + Ho + Ph                 | Horvath Age            | −0.04 (−0.40, 0.48)         | 0.85           |
| LP-IR            | Gr + Ha + Ho + Ph                 | Phenotypic Age         | −0.12 (−0.65, 0.42)         | 0.66           |
| DRI              | Gr + Ha + Ho + Ph                 | Phenotypic Age         | −0.10 (−0.51, 0.31)         | 0.64           |

Abbreviations: Gr: Grim Age; Ha: Hannum Age; Ho: Horvath Age; Ph: Phenotypic Age; CI: confidence interval.

**Supplementary Table 7. Associations between LDL and HDL and accelerated ages of individual epigenetic and transcriptomic aging biomarkers.**

| <b>Biomarker</b> | <b>Aging predictor</b> | <b>Coefficient (95% CI)</b>           | <b>P-value</b> |
|------------------|------------------------|---------------------------------------|----------------|
| HDL              | GrimAge                | -0.33 (-0.68, 0.03)                   | 0.07           |
| LDL              | GrimAge                | -0.22 (-1.34, 0.90)                   | 0.70           |
| HDL              | Hannum Age             | -0.32 (-0.65, $6.28 \times 10^{-3}$ ) | 0.05           |
| LDL              | Hannum Age             | -1.11 (-2.16, -0.07)                  | 0.04           |
| HDL              | Horvath Age            | -0.29 (-0.62, 0.04)                   | 0.08           |
| LDL              | Horvath Age            | -1.13 (-2.15, -0.10)                  | 0.03           |
| HDL              | Phenotypic Age         | -0.30 (-0.56, -0.04)                  | 0.03           |
| LDL              | Phenotypic Age         | -0.74 (-1.56, 0.09)                   | 0.08           |
| HDL              | Transcriptomic Age     | -0.18 (-0.12, 0.48)                   | 0.25           |
| LDL              | Transcriptomic Age     | 0.24 (-0.61, 1.09)                    | 0.58           |

Abbreviation: CI: confidence interval.
